# Supplementary material
Source: publisher site journal article supplement (https://www.dovepress.com/article/433686)
Supplement: Supplementary file 1 [file get_supplementary_file.php]

**Supporting information**


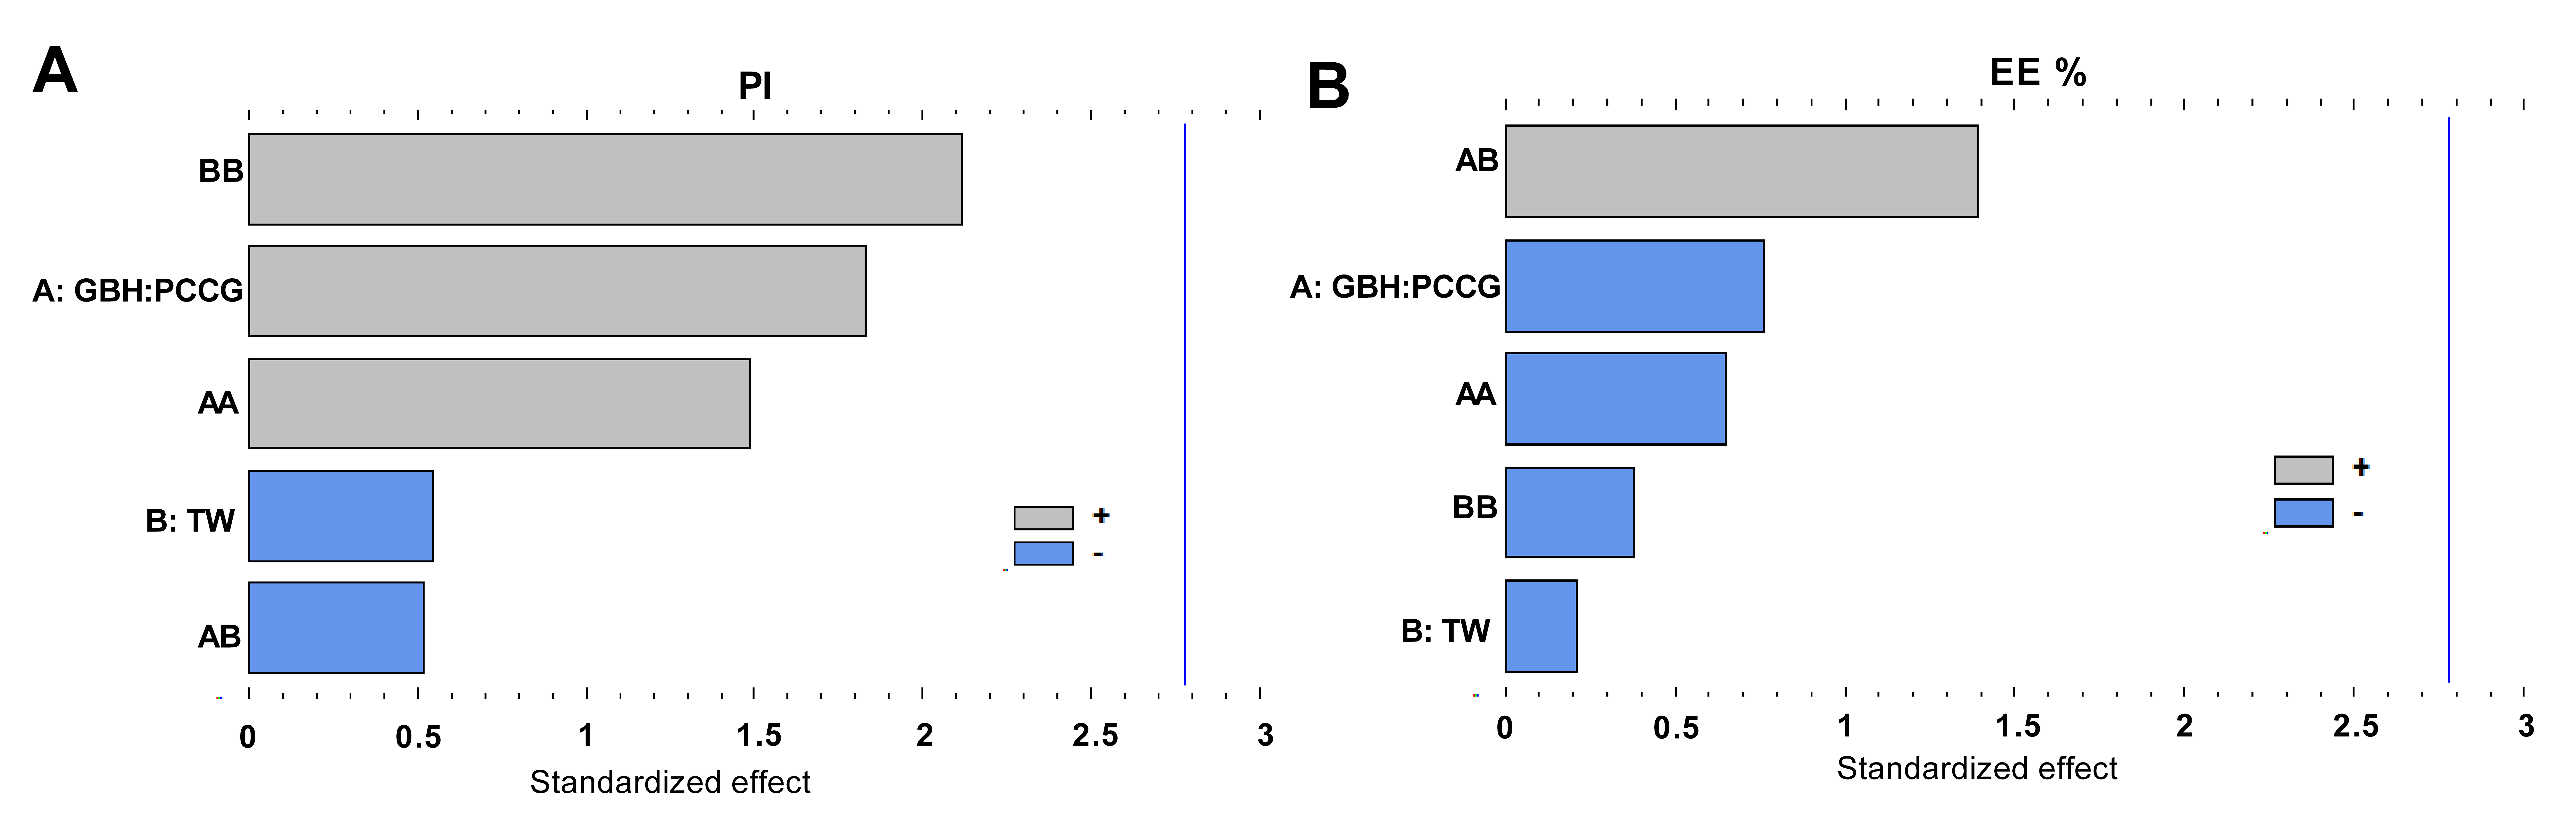


**Figure S1.** Pareto charts obtained by DoE for (A) PI and (B) EE %.

**Table S1**. Physicochemical and organoleptic characterization and stability of GC-TH and GC-TH-NLC along storage for 6 months

|  | **GC-TH** | | | | **GC-TH-NLC** | | | |
| --- | --- | --- | --- | --- | --- | --- | --- | --- |
| t (months) | Appearance | Colour | Odour | pH | Appearance | Colour | Odour | pH |
| 0 | semi-solid translucid | transparent | characteristic | 5.56 | semi-solid opaque | off-white | characteristic | 5.43 |
| 1 | 5.51 | 5.33 |
| 3 | 5.47 | 5.28 |
| 6 | 5.43 | 5.22 |


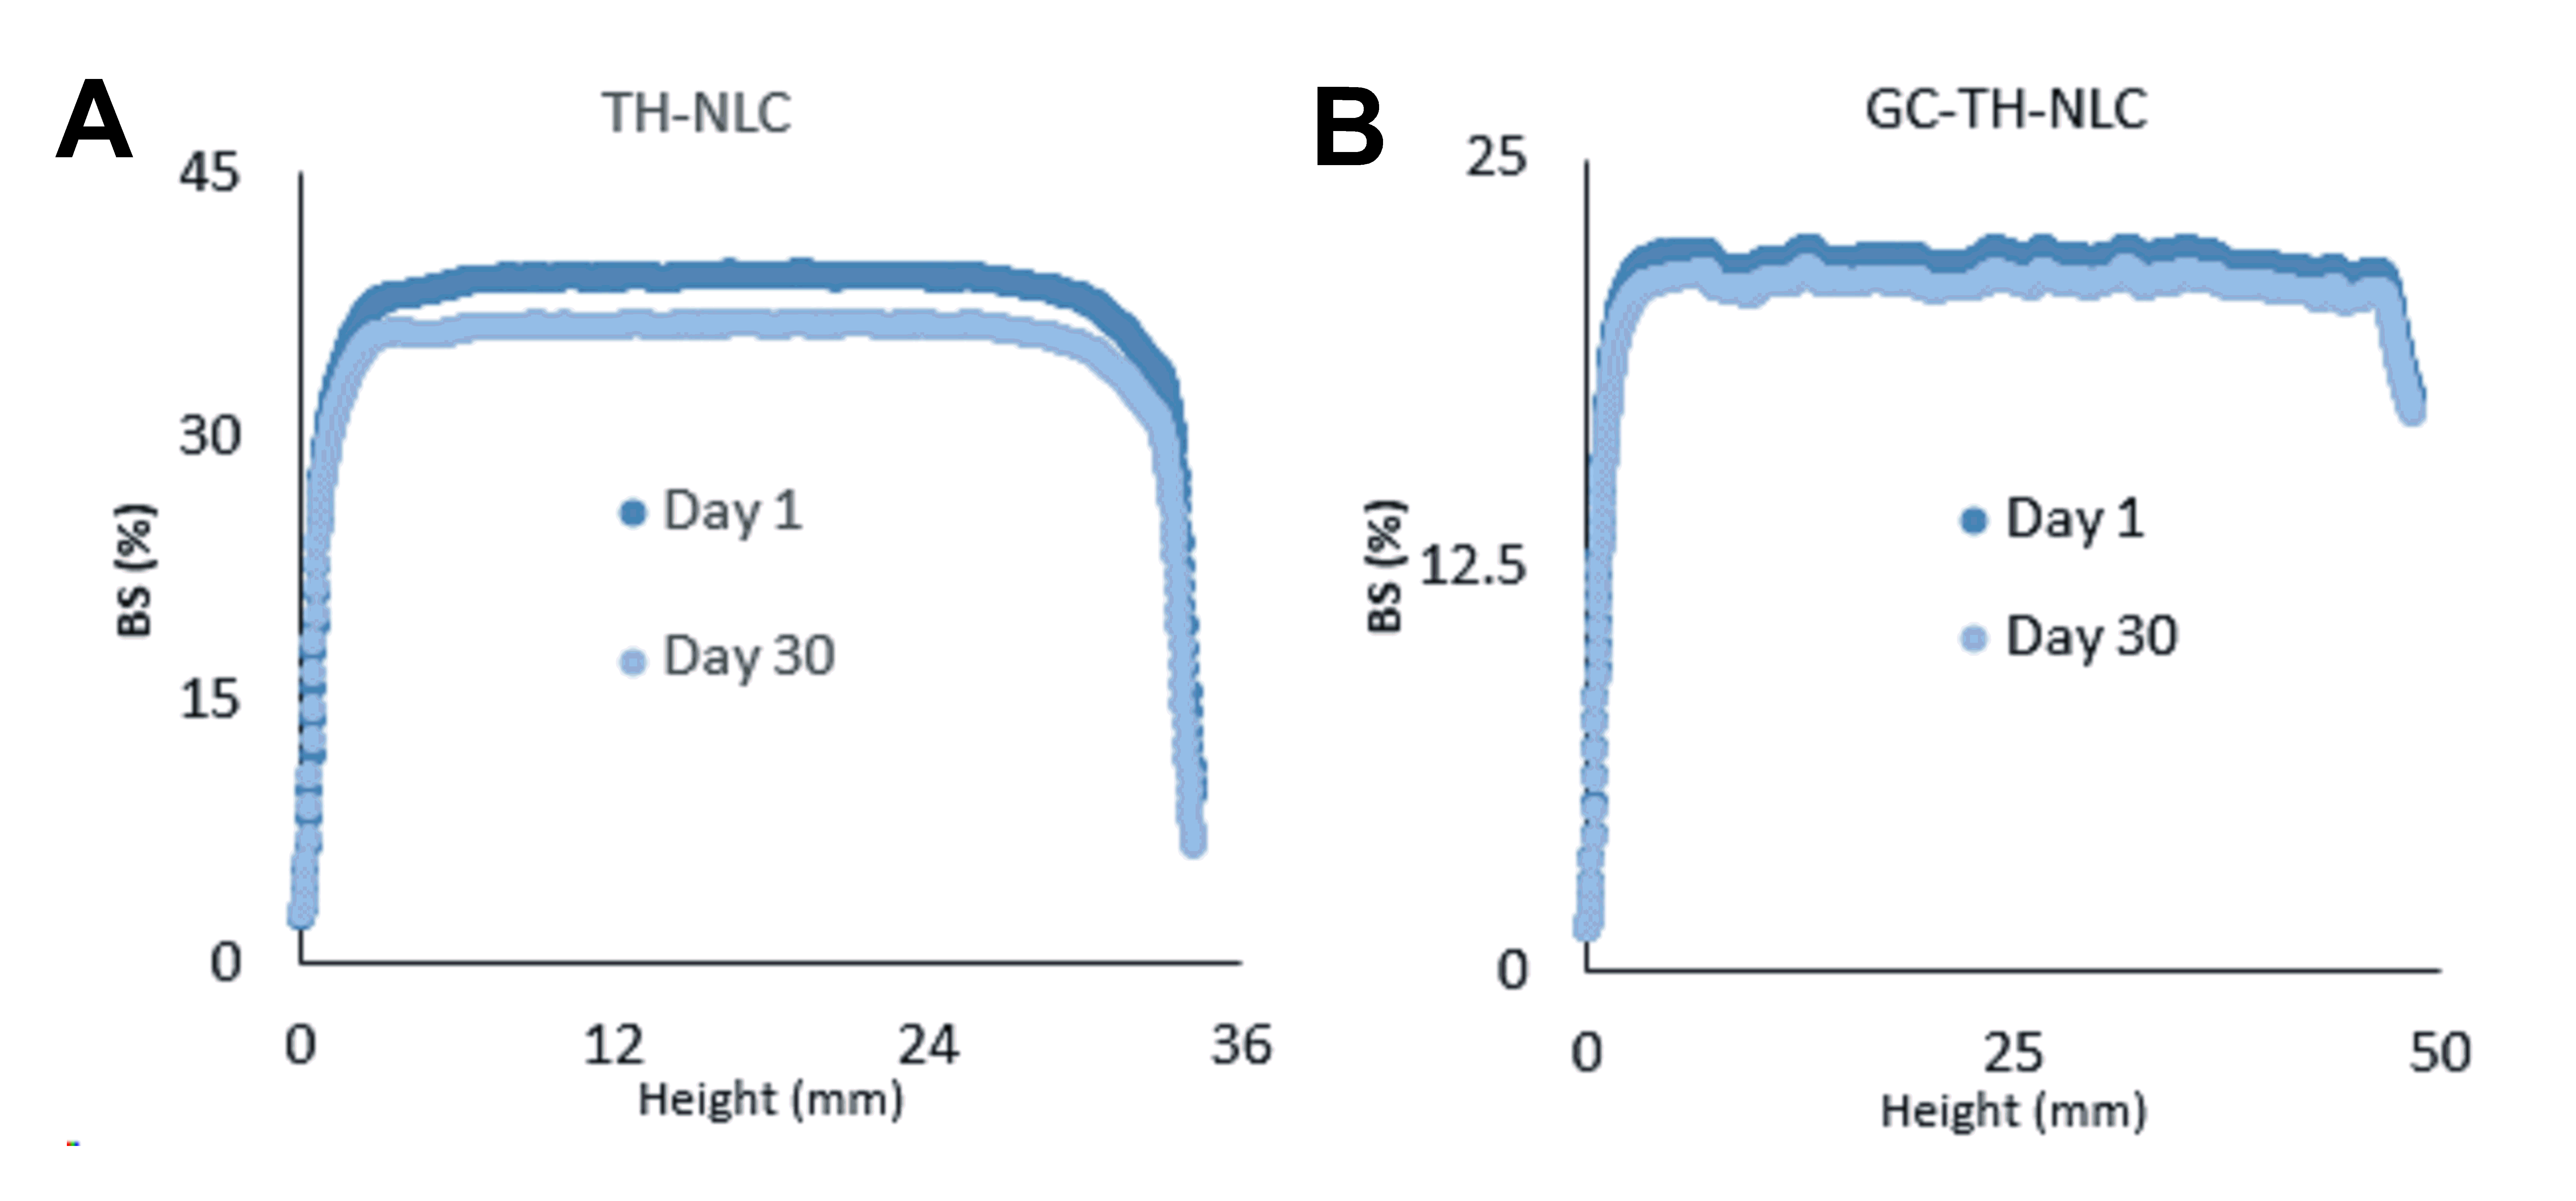


**Figure S2.** Backscattering signal of (A) TH-NLC and (B) GC-TH-NLC after 1 month storage at 4 ± 2 °C and 23 ± 2 °C, respectively.
